# Supplementary material for: Towards efficient photoinduced charge separation in carbon nanodots and TiO2 composites in the visible region
Source: Royal Society of Chemistry journal article supplement (doi:10.1039/c5cp00444f), 2015-01-01
Supplement: c5cp00444f1.pdf [file c5cp00444f1.pdf]

# Electronic Supplementary Information

## **Towards efficient photoinduced charge separation in carbon nanodots and TiO<sub>2</sub> composites in visible region**

Mingye Sun,<sup>ab</sup> Songnan Qu,<sup>\*a</sup> Wenyu Ji,<sup>a</sup> Pengtao Jing,<sup>a</sup> Di Li,<sup>a</sup> Li Qin,<sup>a</sup> Junsheng Cao,<sup>a</sup> Hong Zhang,<sup>c</sup> Jialong Zhao<sup>a</sup> and Dezhen Shen<sup>\*a</sup>

<sup>a</sup> State Key Laboratory of Luminescence and Applications, Changchun Institute of Optics, Fine Mechanics and Physics, Chinese Academy of Sciences, 3888 Eastern South Lake Road, Changchun Jilin 130033, China

<sup>b</sup> University of Chinese Academy of Sciences, Beijing 100039, China

<sup>c</sup> Van't Hoff Institute for Molecular Sciences, University of Amsterdam, Science Park 904, 1098 XH Amsterdam, The Netherlands

E-mail: qusn@ciomp.ac.cn, shendz@ciomp.ac.cn

## Characterization

The UV-Vis absorption spectra of CDs-V in water and CdSe/ZnS core/shell QDs in toluene were recorded on a UV-3101PC UV-Vis-NIR scanning spectrophotometer (Shimadzu). The mass extinction coefficients of the CDs-V and CdSe/ZnS core/shell QDs were calculated using Lambert-Beer's law:  $A = \varepsilon CL$ .  $A$  is the absorbance of sample solution.  $C$  (g/L) is the mass concentration.  $L$  (cm) is the path length of radiation beam across the sample solution in quartz cuvette, which is 1 cm.  $\varepsilon$  ( $\text{cm}^{-1}(\text{g/L})^{-1}$ ) is the mass extinction coefficient. The PL spectra were recorded by a Hitachi F-7000 spectrophotometer. The diffuse reflectance spectra were also measured by Hitachi F-7000 spectrophotometer with an integrating sphere scanning from 200-700 nm with  $\text{BaSO}_4$  as the reference. The morphology of CDs-V/ $\text{TiO}_2$  composites was measured by a Philips TECNAI G2 transmission electron microscope. The time-resolved PL spectra were measured by a LifeSpec-II dedicated lifetime spectrometer (Edinburgh Instruments). The excitation source was picosecond pulsed diode laser with a laser wavelength of 405 nm. The real-time monitoring of the characteristic absorption peak of RhB was managed using the absorbance mode of USB4000-UV-VIS Spectrometer with reference light from Ocean Optics HL-2000 light source. 510 nm cut-off filter was equipped on the light source to prevent the excitation of CDs-V and CDs-U. The pH values of the RhB and mixed solutions of RhB with CDs-V,  $\text{TiO}_2$ , CDs-U/ $\text{TiO}_2$  and CDs-V/ $\text{TiO}_2$  composites were measured by PHS-3C pH meter. The illumination intensity at the solution surface was measured by an Ophir LaserStar laser power meter with a 3A laser sensor. The IPCE spectra of CD-sensitized solar cells were measured by a Keithley 2000 multimeter with illumination by a 300 W tungsten lamp with a Spectral Product DK240 monochromator. Three cells were constructed and evaluated in parallel.

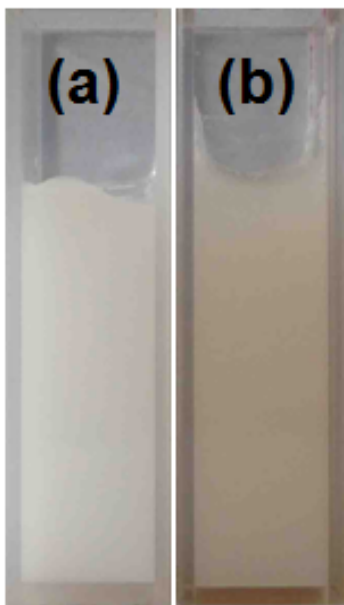

**Fig. S1** Optical images of pure  $\text{TiO}_2$  (a) and CDs-V/ $\text{TiO}_2$  composites (b).

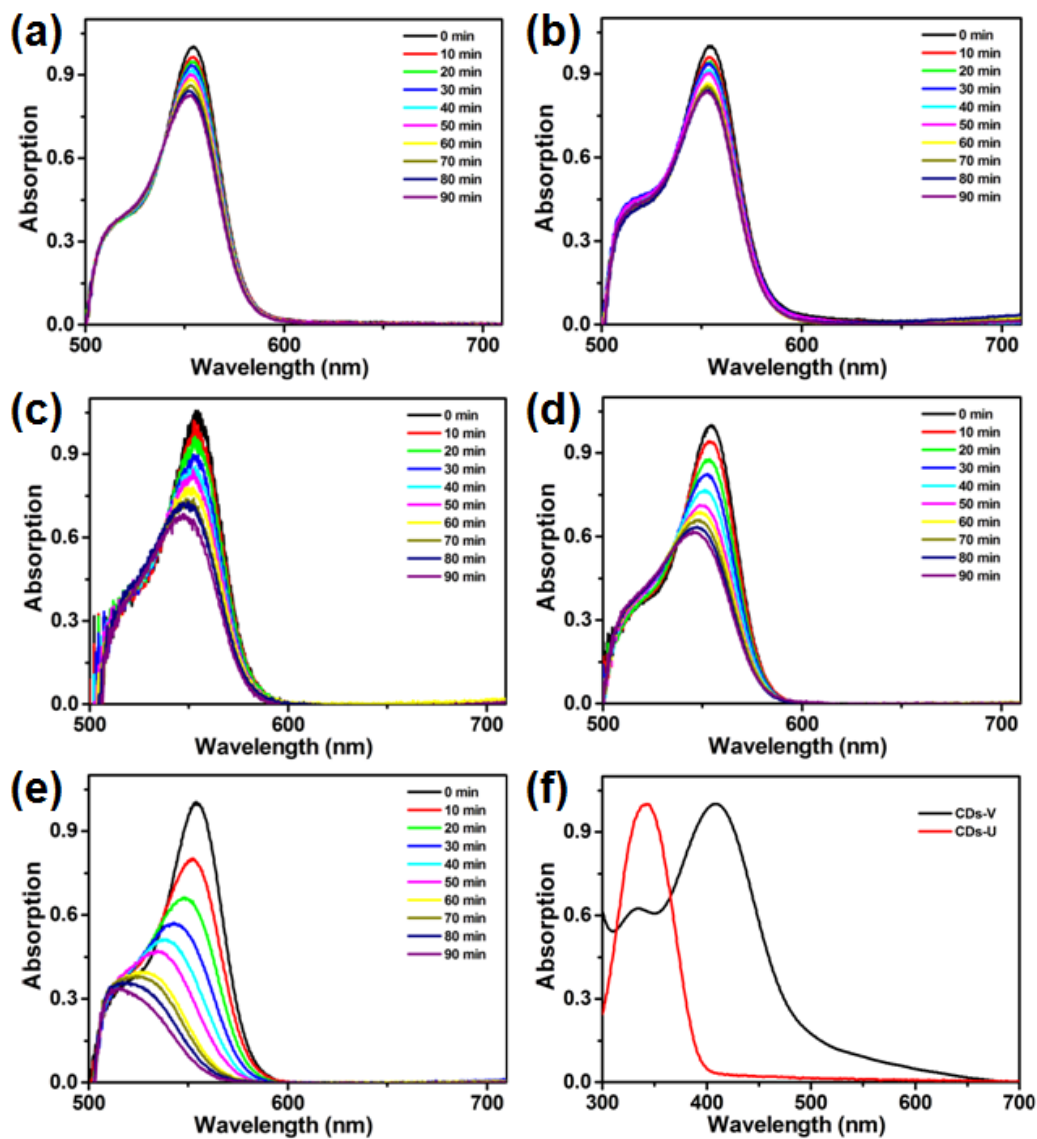

**Fig. S2** The normalized absorption spectra of RhB solution (a) and RhB solutions mixed with CDs-V (b), pure TiO<sub>2</sub> (c), CDs-U/TiO<sub>2</sub> (d) and CDs-V/TiO<sub>2</sub> composites (e) after different visible light irradiation time. (f) Normalized UV-Vis absorption spectra of CDs-U and CDs-V.
